# Supplementary material for: A Novel Approach Toward the Prevention of the Side Channel Attacks for Enhancing the Network Security
Source: Research Square preprint supplement (doi:10.21203/rs.3.rs-2074983/v1), 2022-09-20
Supplement: Supplementary file 1 [file e5de7c6eae36174cdd40386a.docx]

**Highlights**

**The primary objectives of this paper are drafted as follows,**

The key roles of this proposed model are summarized as,

- This paper presents a countermeasure of the Cache Side channel attack by proposing a comprehensive way of designing the cache memory usage.
- This would ultimately serve the purpose of security.
- The system model that is being used in this paper, is considered ideal for the attacker to steal data.
- Our vision was to make secret data leak through timing-based cache side-channel attack theoretically impossible.
- If one cannot steal data from the most suitable system for the side channel attack, the attack will evidently fail in more complex real-world cases.
- Following this perspective, we will be able to make the shared libraries ecosystem more robust and secure without compromising memory efficiency a lot.

Thank you very much

Yours

Dr. Ahmed A. Elngar (Corresponding Author)

Associate Professor

Faculty of Computers & Artificial Intelligence, Beni-Suef University, Beni-Suef City, 62511, Egypt.

Tel: 002 – 01007400752

e-mail: [elngar_7@yahoo.co.uk](mailto:elngar_7@yahoo.co.uk)
